# Supplementary material
Source: PubMed Central journal article supplement (PMC6371219)
Supplement: PRO-28-620-s001.pdf [file PRO-28-620-s001.pdf]

## Supplementary Material

### The $pK_a$ values of the catalytic residues in the retaining glycoside hydrolase T26H mutant of T4 lysozyme

Jacob A. Brockerman,<sup>1</sup> Mark Okon,<sup>1,2</sup> Stephen G. Withers,<sup>1,2,3</sup> and

Lawrence P. McIntosh<sup>1,2,3\*</sup>

<sup>1</sup> Department of Biochemistry and Molecular Biology, University of British Columbia, Vancouver, BC, Canada V6T 1Z3

<sup>2</sup> Department of Chemistry, University of British Columbia, Vancouver, BC, Canada V6T 1Z1

<sup>3</sup> Michael Smith Laboratories, University of British Columbia, Vancouver, BC, Canada V6T 1Z4

\* Correspondence to: Lawrence P. McIntosh

Department of Biochemistry and Molecular Biology,

University of British Columbia,

Vancouver, BC, Canada V6T 1Z3

phone: 604-822-3341

Email: mcintosh@chem.ubc.ca



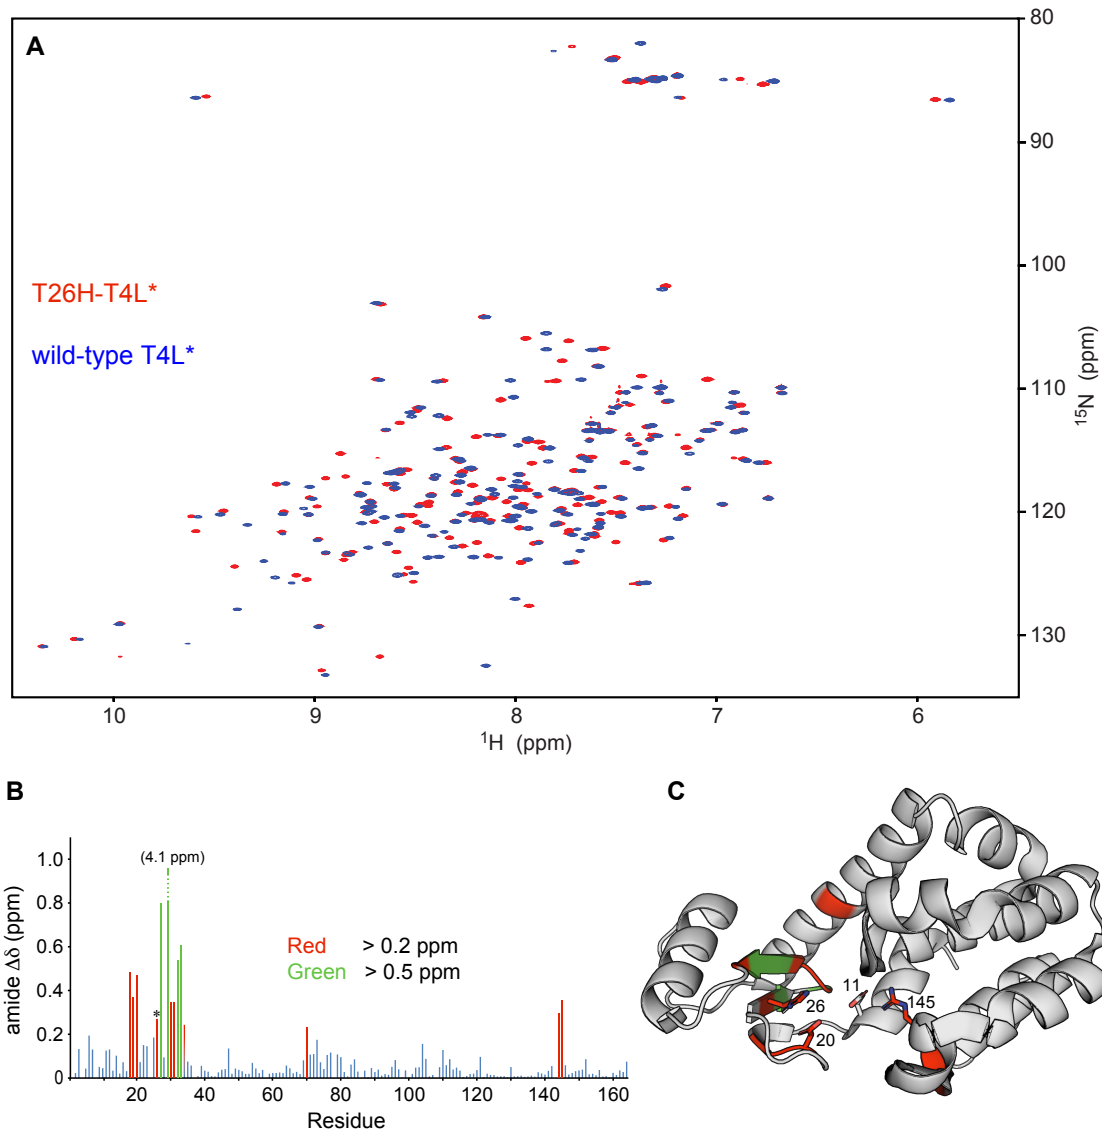

**Supporting Information Figure S2.** (A) Overlaid  $^{15}\text{N}$ -HSQC spectra of T26H-T4L\* (red) and wild-type T4L\* (blue) with both samples at pH 5.5 and 25 °C. Signals from amides and arginine sidechains ( $\sim 85$  ppm in  $^{15}\text{N}$ ) are shown. (B) Histogram of amide chemical shift differences between corresponding amides in the two proteins, calculated<sup>1</sup> as  $\Delta\delta = \{(\Delta\delta_{\text{H}})^2 + \{(0.14\Delta\delta_{\text{N}})^2\}^{1/2}$ . Blank values are for prolines and residues for which assignments were not obtained. (C) When mapped on the structure of T26H-T4L\* (1QT8.pdb), amides with the largest perturbed chemical shifts cluster around position 26 (\*).

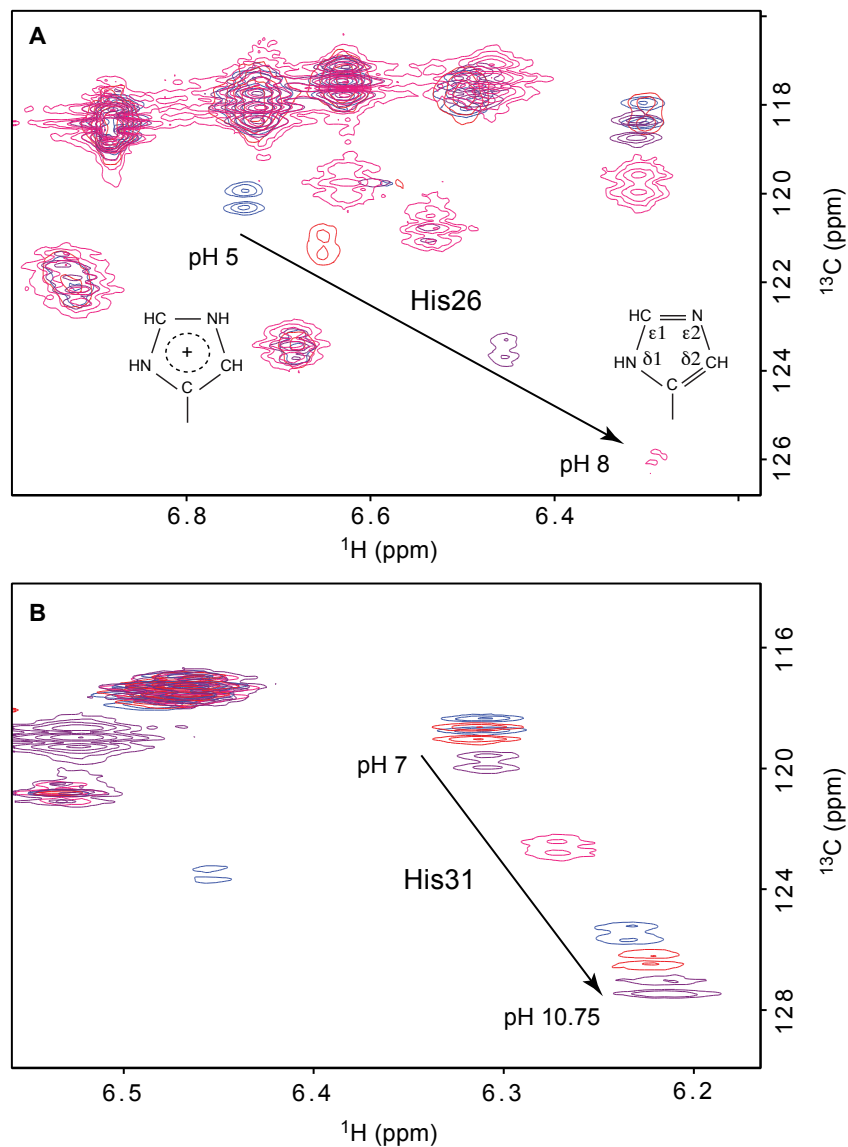

**Supporting Information Figure S3.** Superimposed  $^{15}\text{N}$ -decoupled  $^{13}\text{C}$ -HSQC spectra of uniformly  $^{13}\text{C}/^{15}\text{N}$ -labeled T26H-T4L\* showing the  $^1\text{H}^{\delta 2}$ - $^{13}\text{C}^{\delta 2}$  signals of (A) His26 and (B) His31 as the protein was titrated between pH 5 and 11 at 25 °C. The  $^{13}\text{C}^{\delta 2}$  signals are doublets due to  $^1\text{J}_{\text{CC}}$  coupling with the adjacent  $^{13}\text{C}^{\gamma}$ . For clarity, only representative titration points are shown, and all data are presented in Fig. 2B. Both neutral histidines adopt the  $\text{N}^{\delta 1}\text{H}$  tautomer (structure shown) based on fit plateau  $^{13}\text{C}^{\delta 2}$  chemical shifts of 126.7 ppm (His26) and 127.2 ppm (His31).

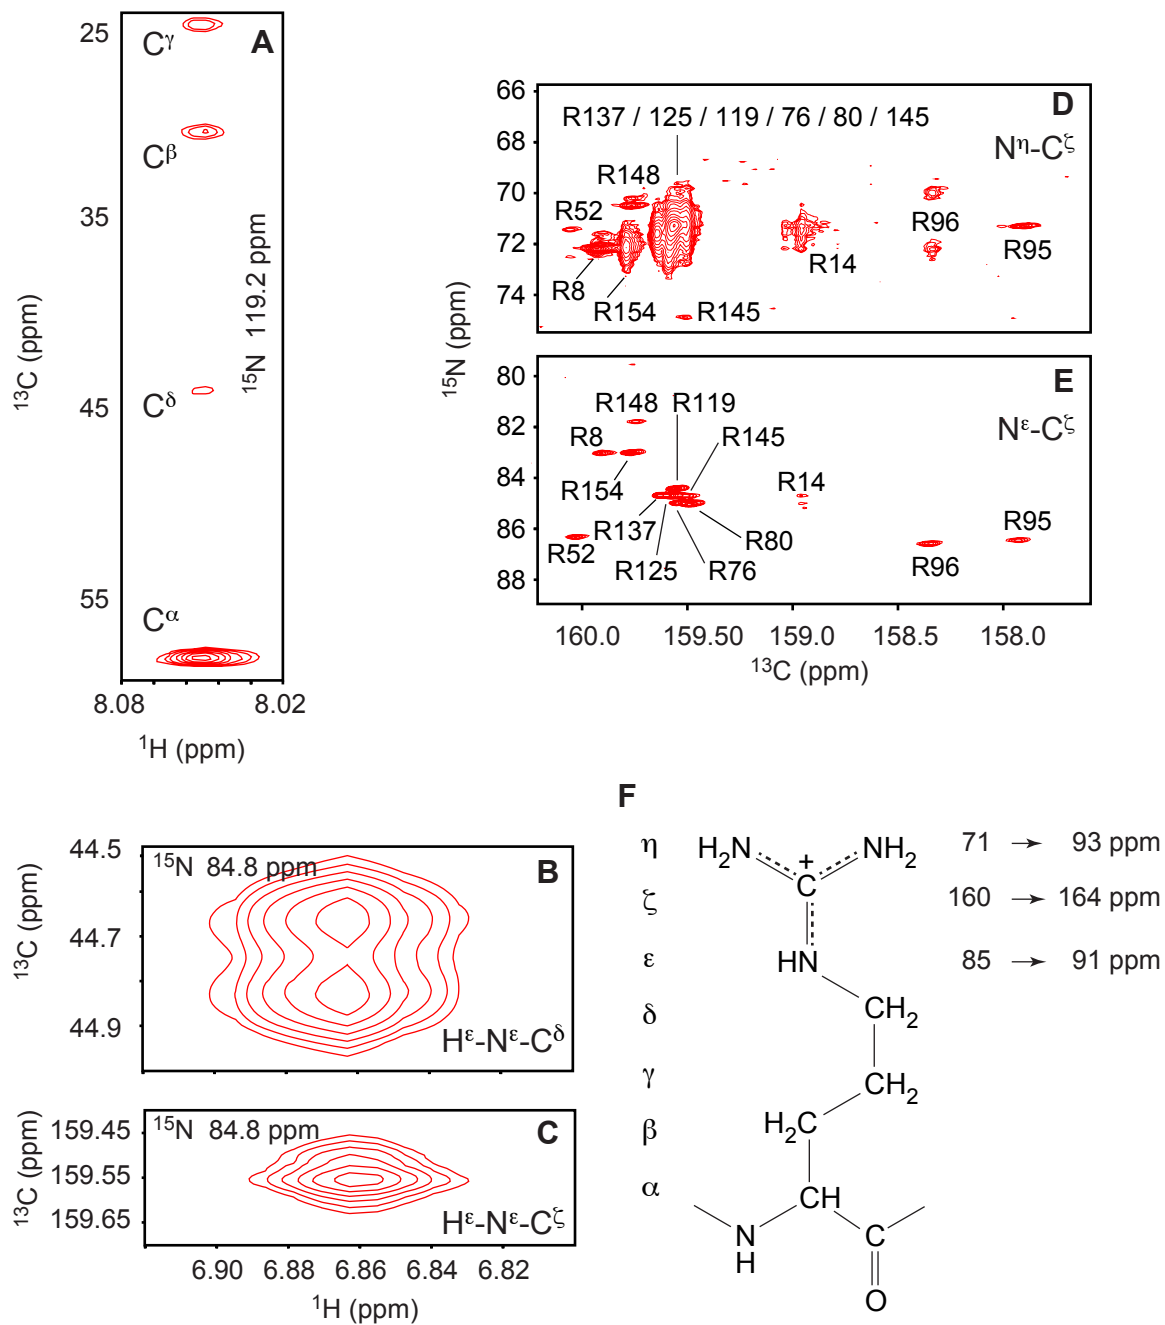

**Supporting Information Figure S4.** Assignment of the signals from the guanidinium sidechain of Arg145 in uniformly  $^{13}\text{C}/^{15}\text{N}$ -labeled T26H-T4L\* at pH 6.5 and 25 °C. (A) The  $^1\text{H}$ - $^{13}\text{C}$  plane from a 3D C(CCO)-TOCSY-NH spectrum taken at the  $^{15}\text{N}$  shift of Ala146 (119.2 ppm). This

provided assignments for the  $^{13}\text{C}^\alpha$  (58.8 ppm),  $^{13}\text{C}^\beta$  (31.2 ppm),  $^{13}\text{C}^\gamma$  (25.5 ppm) and  $^{13}\text{C}^\delta$  (44.8 ppm) of Arg145. (B) The  $^1\text{H}$ - $^{13}\text{C}$  plane at the indicated  $^{15}\text{N}$  shift (84.8 ppm) of a 3D  $\text{H}^\epsilon\text{N}^\epsilon\text{C}^\delta$  spectrum<sup>2</sup> yielded the assignment of the  $^1\text{H}^\epsilon$  (6.86 ppm) and  $^{15}\text{N}^\epsilon$  (84.8 ppm) signals of Arg145 by virtue of a scalar correlation to the  $^{13}\text{C}^\delta$  (see also Fig. 5). (C) The  $^{13}\text{C}^\zeta$  (159.5 ppm) was then assigned from the corresponding  $^1\text{H}$ - $^{13}\text{C}$  plane of a 3D  $\text{H}^\epsilon\text{N}^\epsilon\text{C}^\zeta$  spectrum.<sup>3</sup> (D, E) Finally,  $^{15}\text{N}^\eta$  signals at 75 ppm and  $\sim 71$  ppm were identified from a 2D  $\text{N}^{\epsilon/\eta}$ - $\text{C}^\zeta$  correlation spectrum.<sup>4,5</sup> Panels D and E are from the same  $^{13}\text{C}$ -detected spectrum, but E is displayed at a higher contour level for clarity. These assignments are similar to those reported for wild-type T4L\*.<sup>4-7</sup> (F) The cartoon summarizes the expected  $^{15}\text{N}^\eta$ ,  $^{13}\text{C}^\zeta$ , and  $^{15}\text{N}^\epsilon$  chemical shifts of an arginine sidechain upon titration from its positively charged to neutral form.<sup>8,9</sup> Under these conditions (pH 6.5), all thirteen arginines in T26H-T4L\* have chemical shifts diagnostic of a fully protonated guanidinium group.

## Supplementary References

1. Williamson MP (2013) Using chemical shift perturbation to characterise ligand binding. *Prog Nucl Magn Reson Spectrosc* 73:1-16.
2. Andre I, Linse S, Mulder FA (2007) Residue-specific pK<sub>a</sub> determination of lysine and arginine side chains by indirect <sup>15</sup>N and <sup>13</sup>C NMR spectroscopy: Application to apo calmodulin. *J Am Chem Soc* 129:15805-15813.
3. Kay LE, Ikura M, Tschudin R, Bax A (1990) 3-dimensional triple-resonance NMR-spectroscopy of isotopically enriched proteins. *J Magn Reson* 89:496-514.
4. Yoshimura Y, Oktaviani NA, Yonezawa K, Kamikubo H, Mulder FA (2017) Unambiguous determination of protein arginine ionization states in solution by NMR spectroscopy. *Angew Chem Int Ed Engl* 56:239-242.
5. Werbeck ND, Kirkpatrick J, Hansen DF (2013) Probing arginine side-chains and their dynamics with carbon-detected NMR spectroscopy: Application to the 42 kDa human histone deacetylase 8 at high pH. *Angew Chem Int Ed Engl* 52:3145-3147.
6. Gerecht K, Figueiredo AM, Hansen DF (2017) Determining rotational dynamics of the guanidino group of arginine side chains in proteins by carbon-detected NMR. *Chem Commun (Camb)* 53:10062-10065.
7. Mackenzie HW, Hansen DF (2017) A <sup>13</sup>C-detected <sup>15</sup>N double-quantum NMR experiment to probe arginine side-chain guanidinium <sup>15</sup>N<sup>n</sup> chemical shifts. *J Biomol NMR* 69:123-132.
8. Platzer G, Okon M, McIntosh LP (2014) pH-dependent random coil <sup>1</sup>H, <sup>13</sup>C, and <sup>15</sup>N chemical shifts of the ionizable amino acids: A guide for protein pK<sub>a</sub> measurements. *J Biomol NMR* 60:109-129.
9. Fitch CA, Platzer G, Okon M, Garcia-Moreno BE, McIntosh LP (2015) Arginine: Its pK<sub>a</sub> value revisited. *Protein Sci* 24:752-761.
